# Supplementary material
Source: bioRxiv or medRxiv preprint supplement (https://www.biorxiv.org/highwire/filestream/13460/field_highwire_adjunct_files/4/049478-5.pdf)

# Supplementary Figure 4

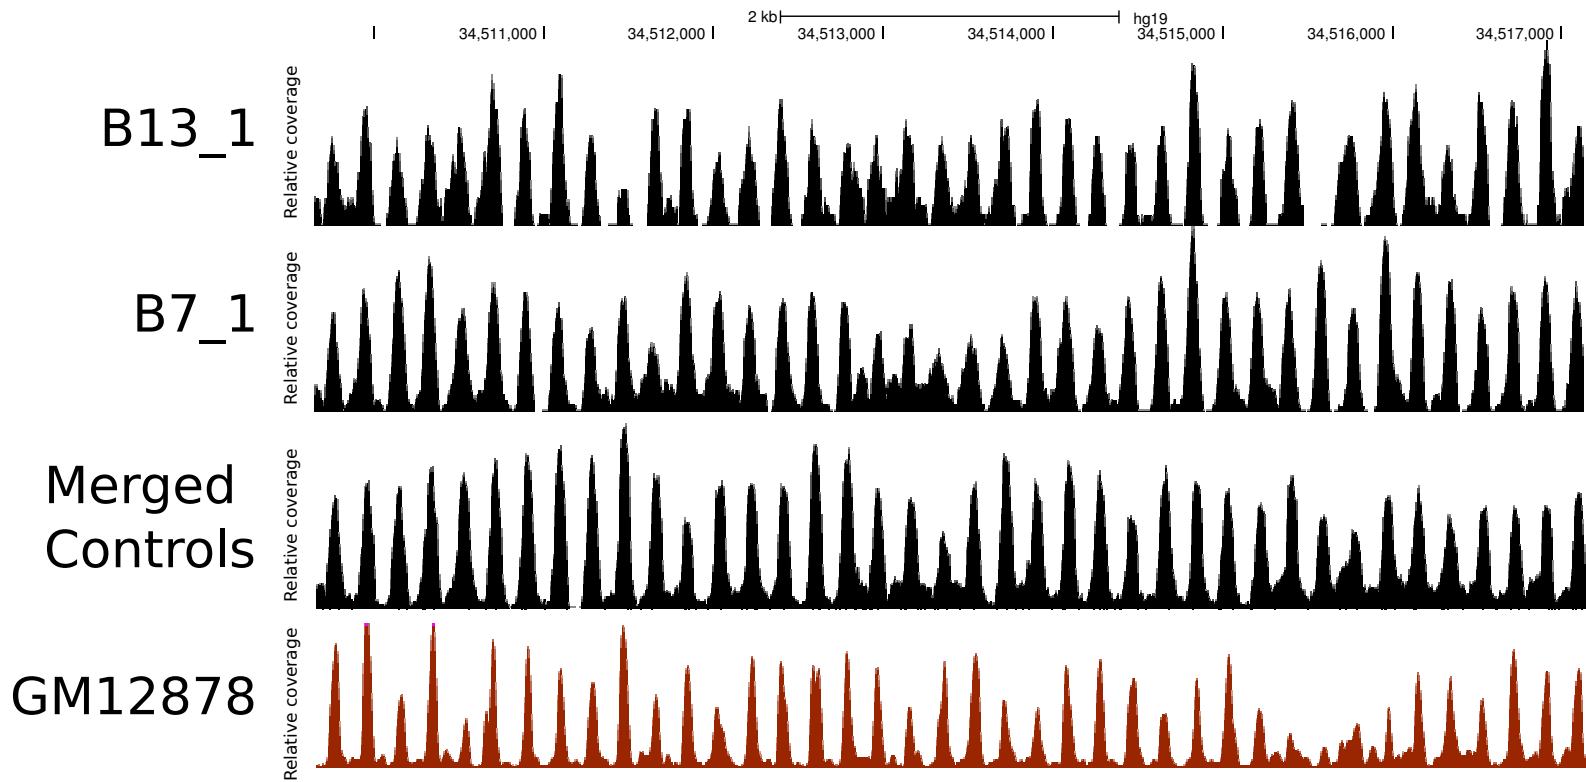

Supplement: Supplementary file [file 049478-5.pdf]
